# Supplementary material for: Eliciting an immune-mediated antitumor response through oncolytic herpes simplex virus-based shared antigen expression in tumors resistant to viroimmunotherapy
Source: PubMed Central journal article supplement (PMC8488720; doi:10.1136/jitc-2021-002939), 2021-10-01
Supplement: jitc-2021-002939supp001.pdf [file jitc-2021-002939supp001.pdf]

# Supplemental Figures

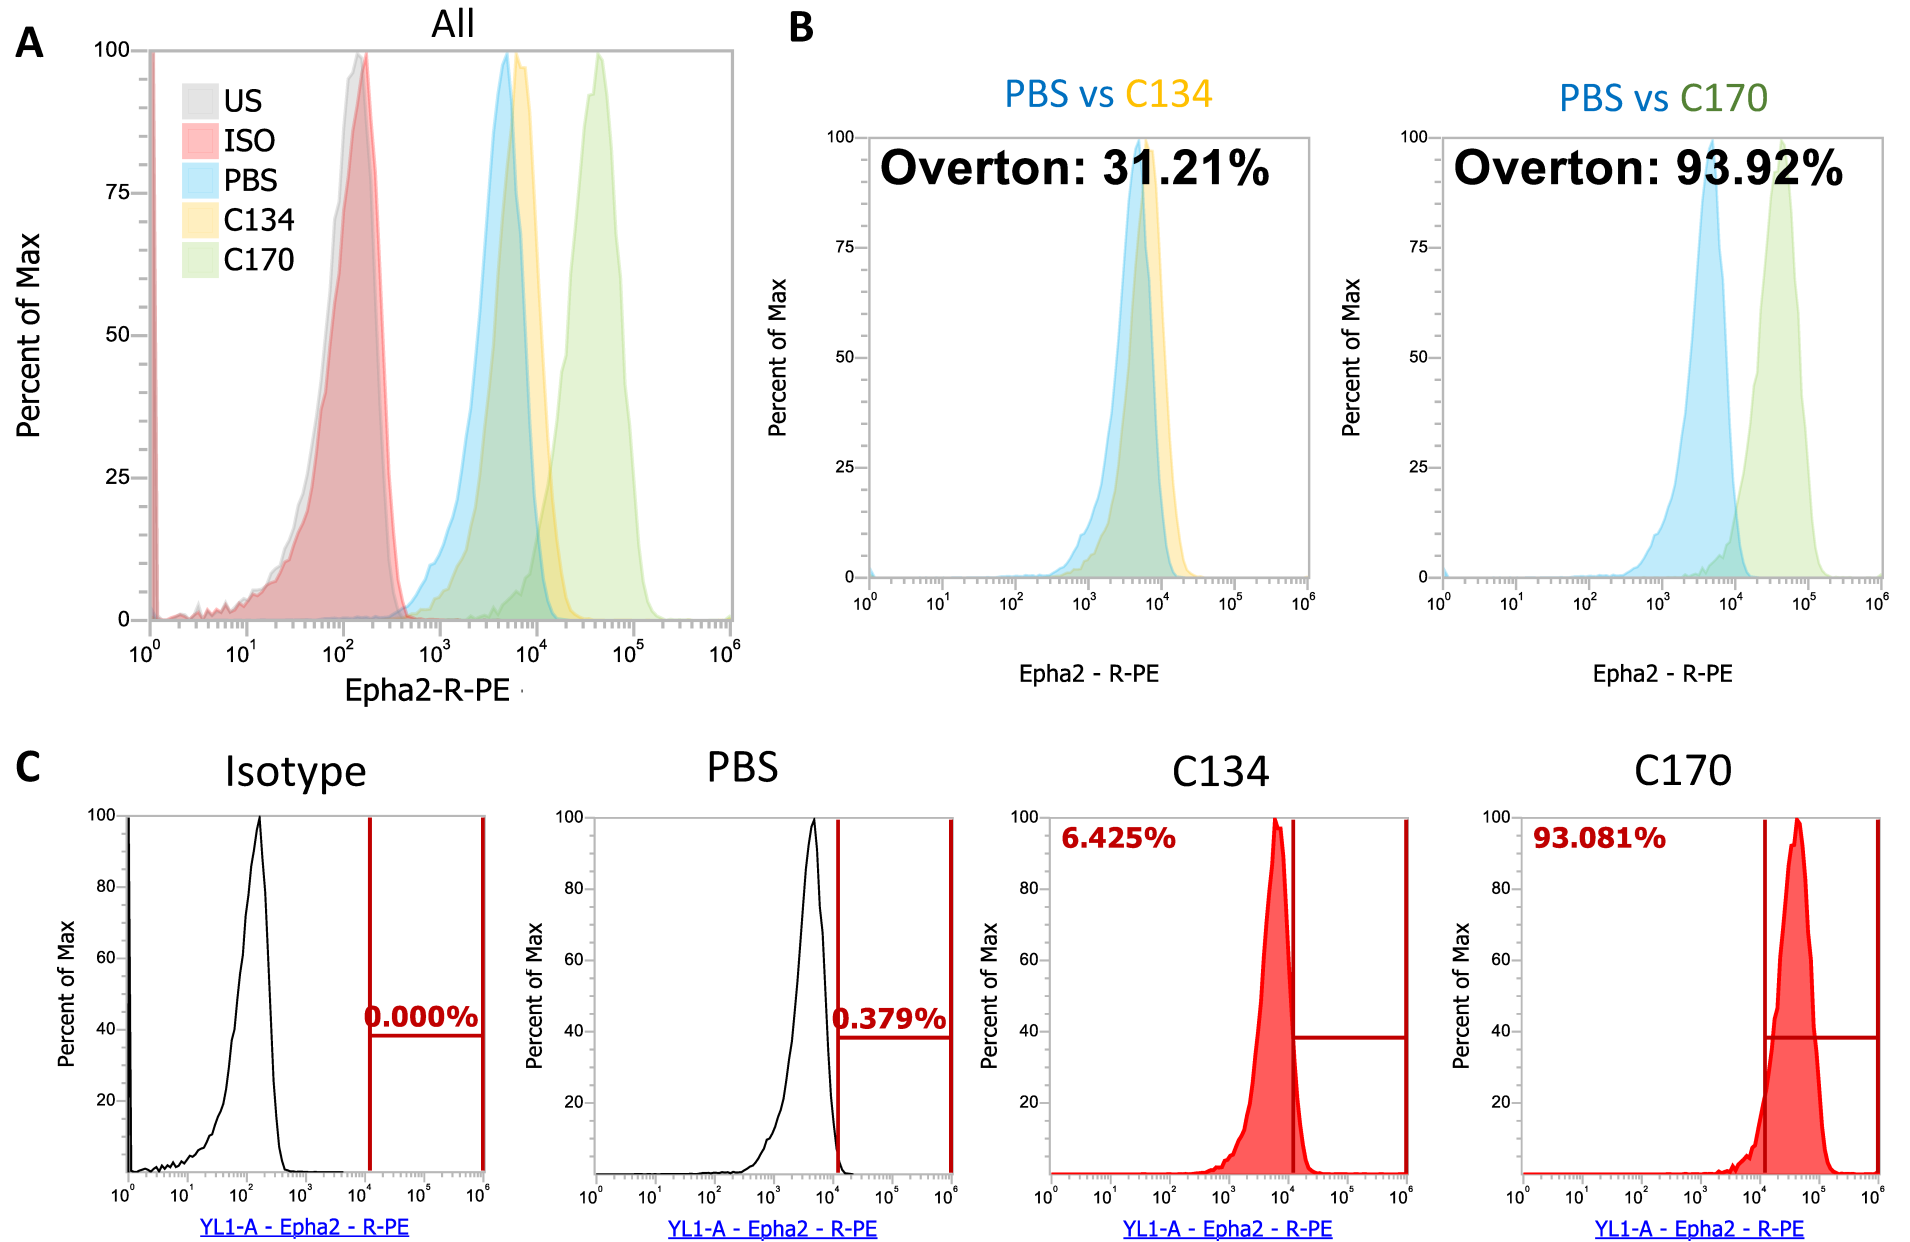

Supplemental Figure 1

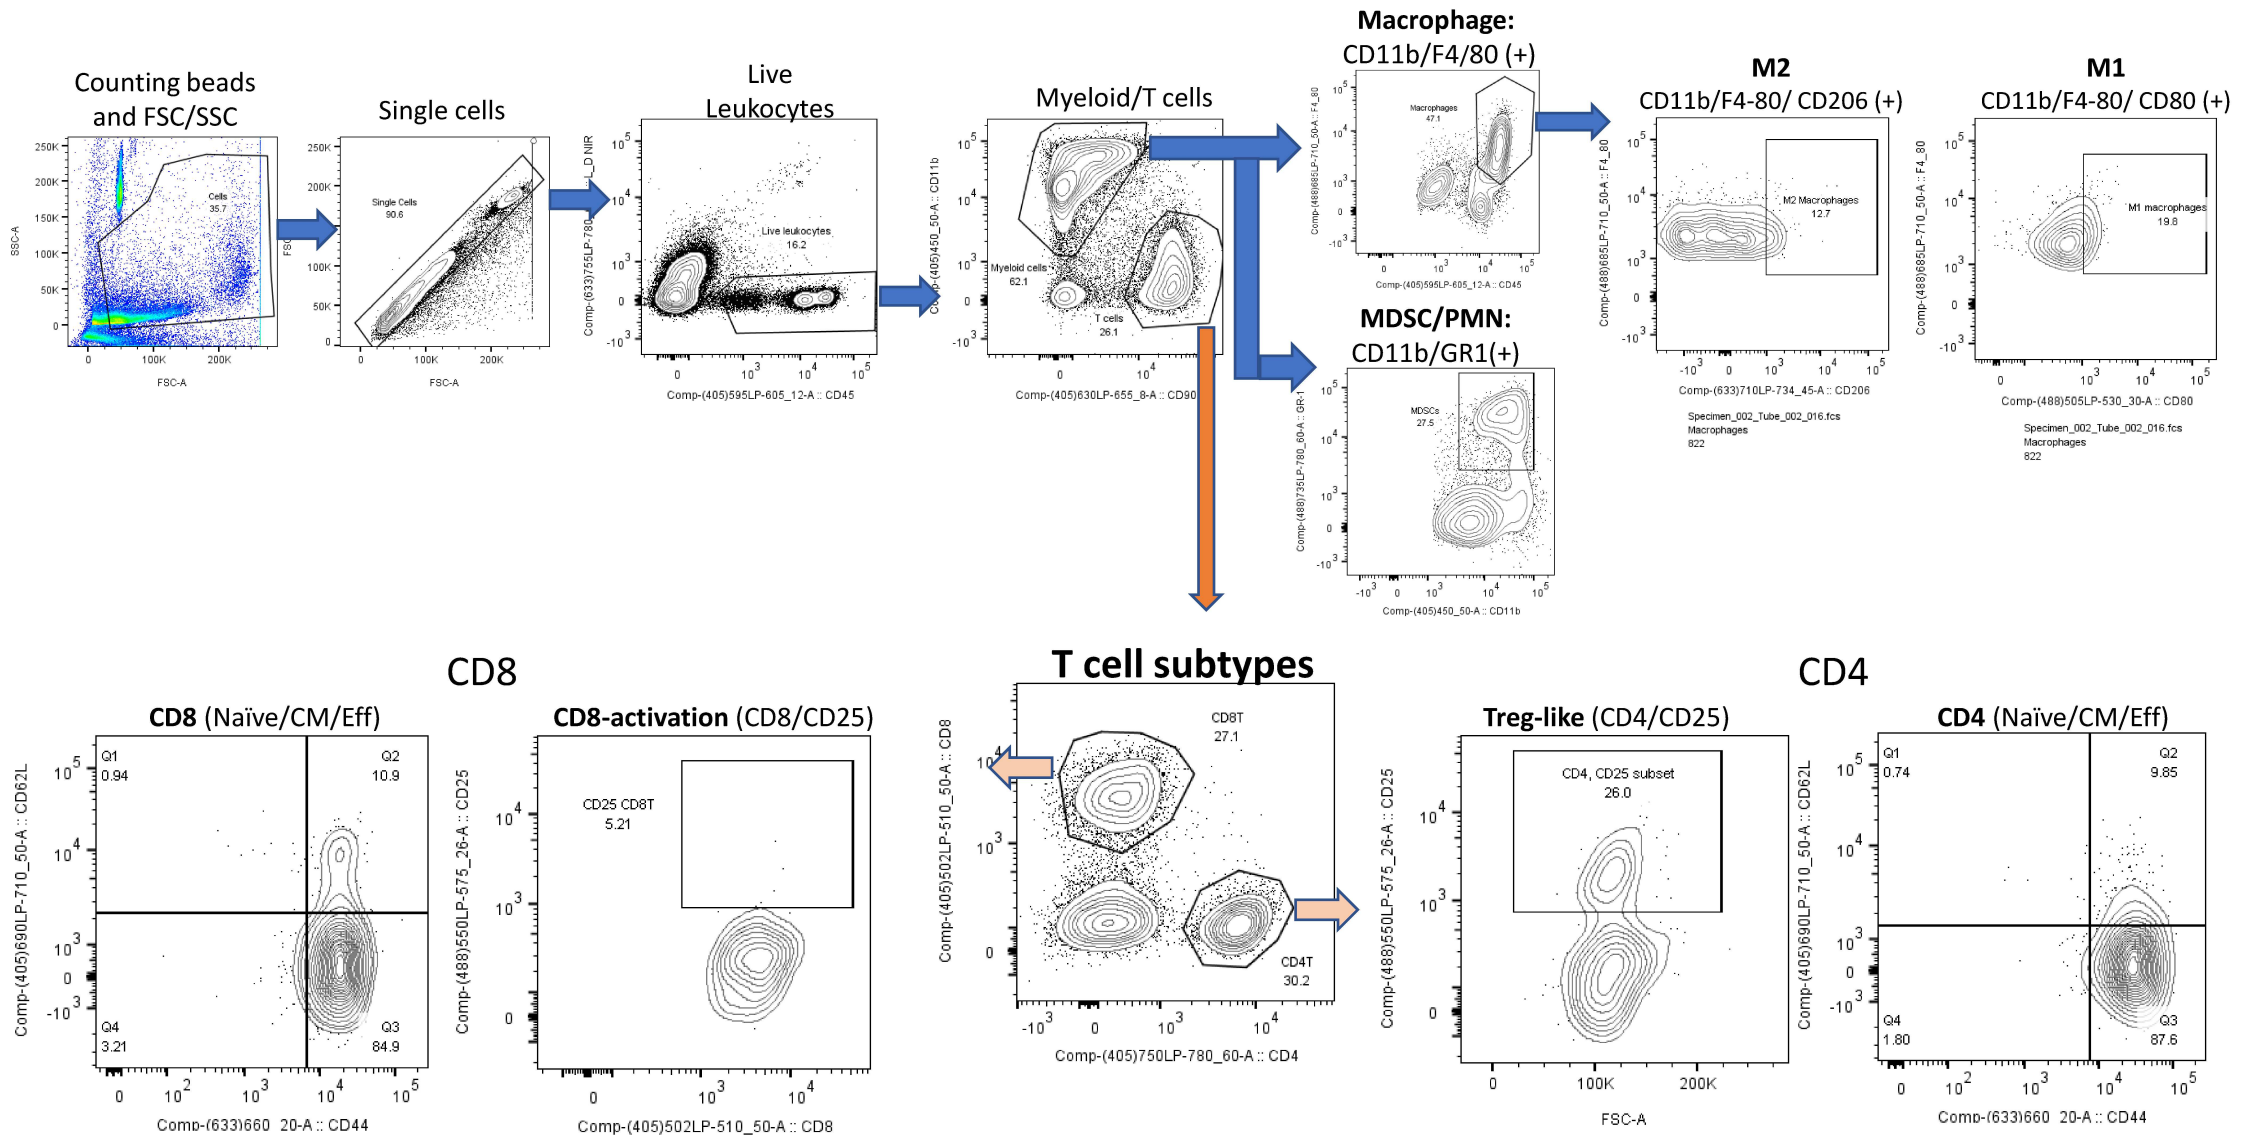

Supplemental Figure 2

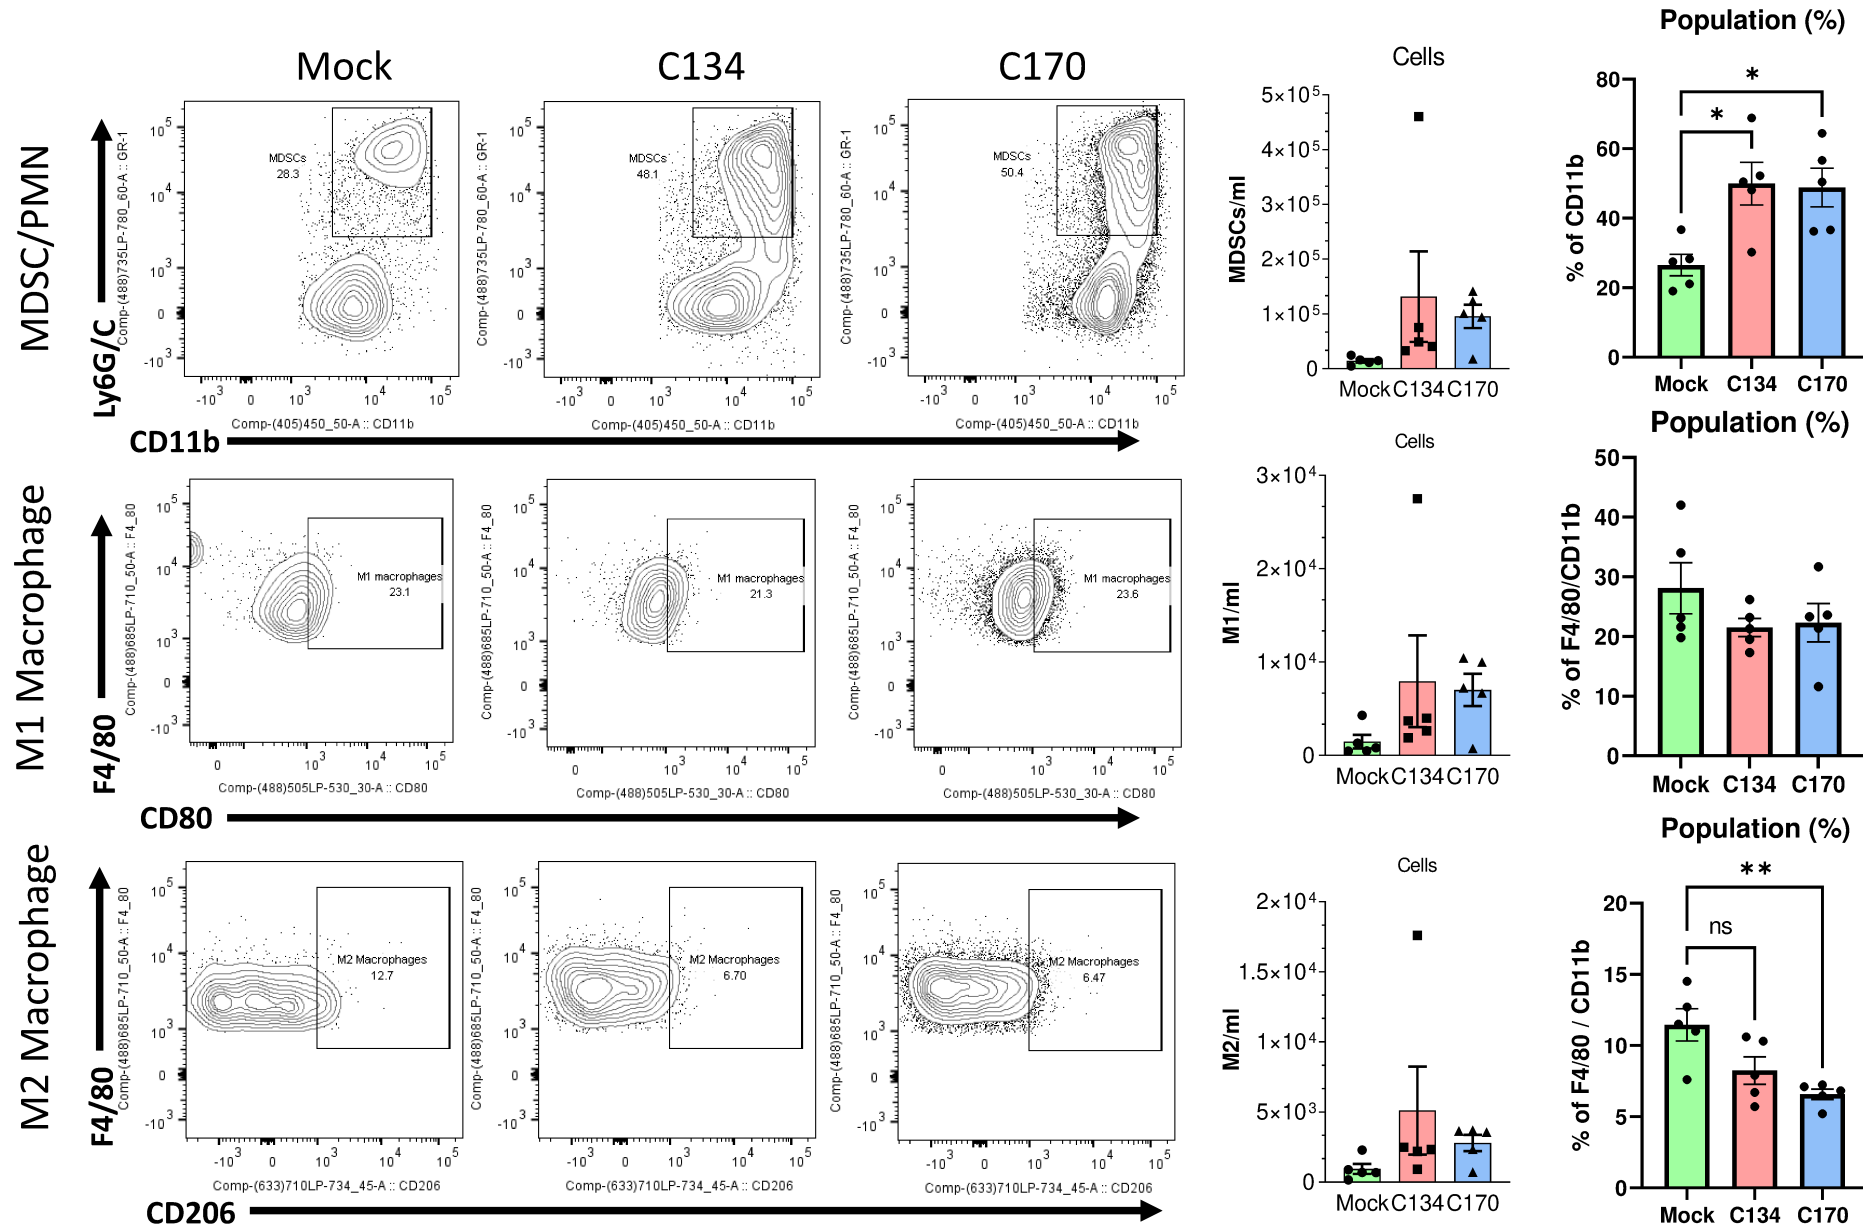

Supplemental Figure 3

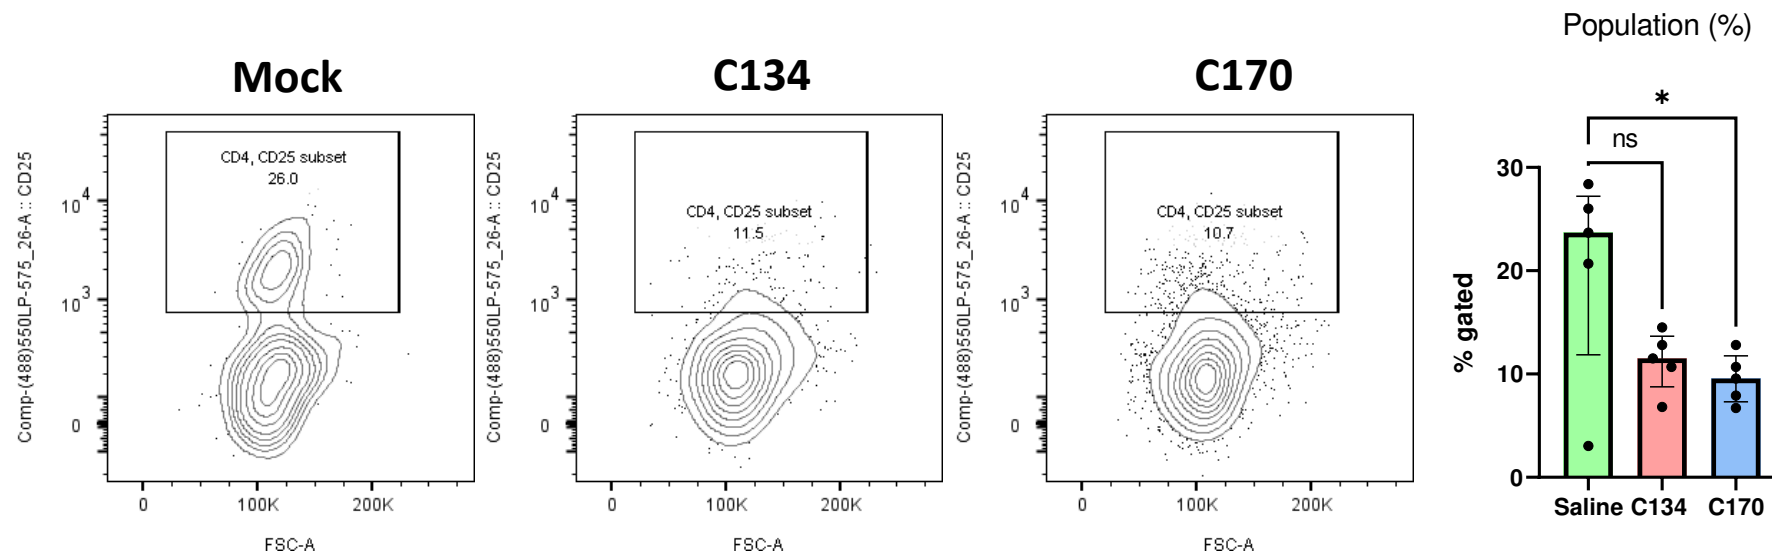

Supplemental Figure 4

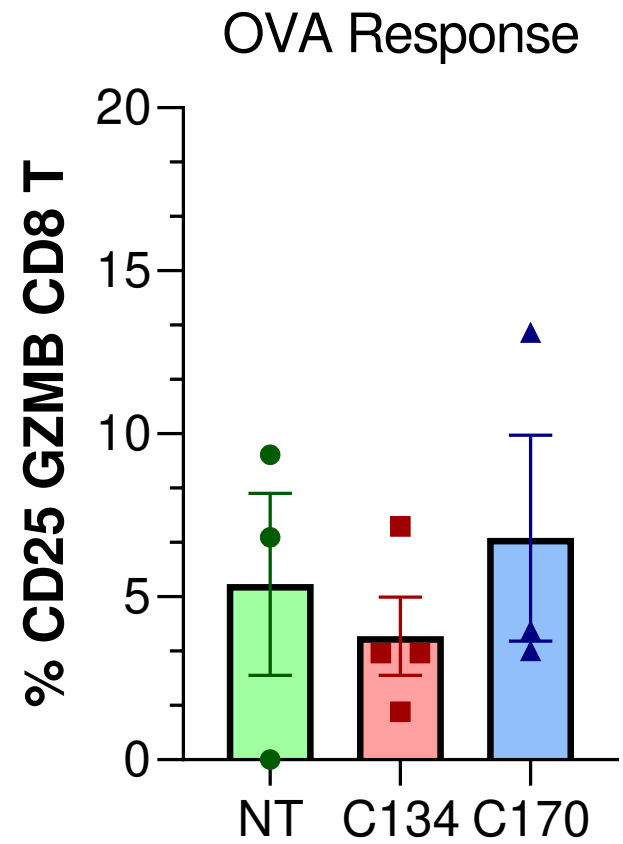

Supplemental Figure 5

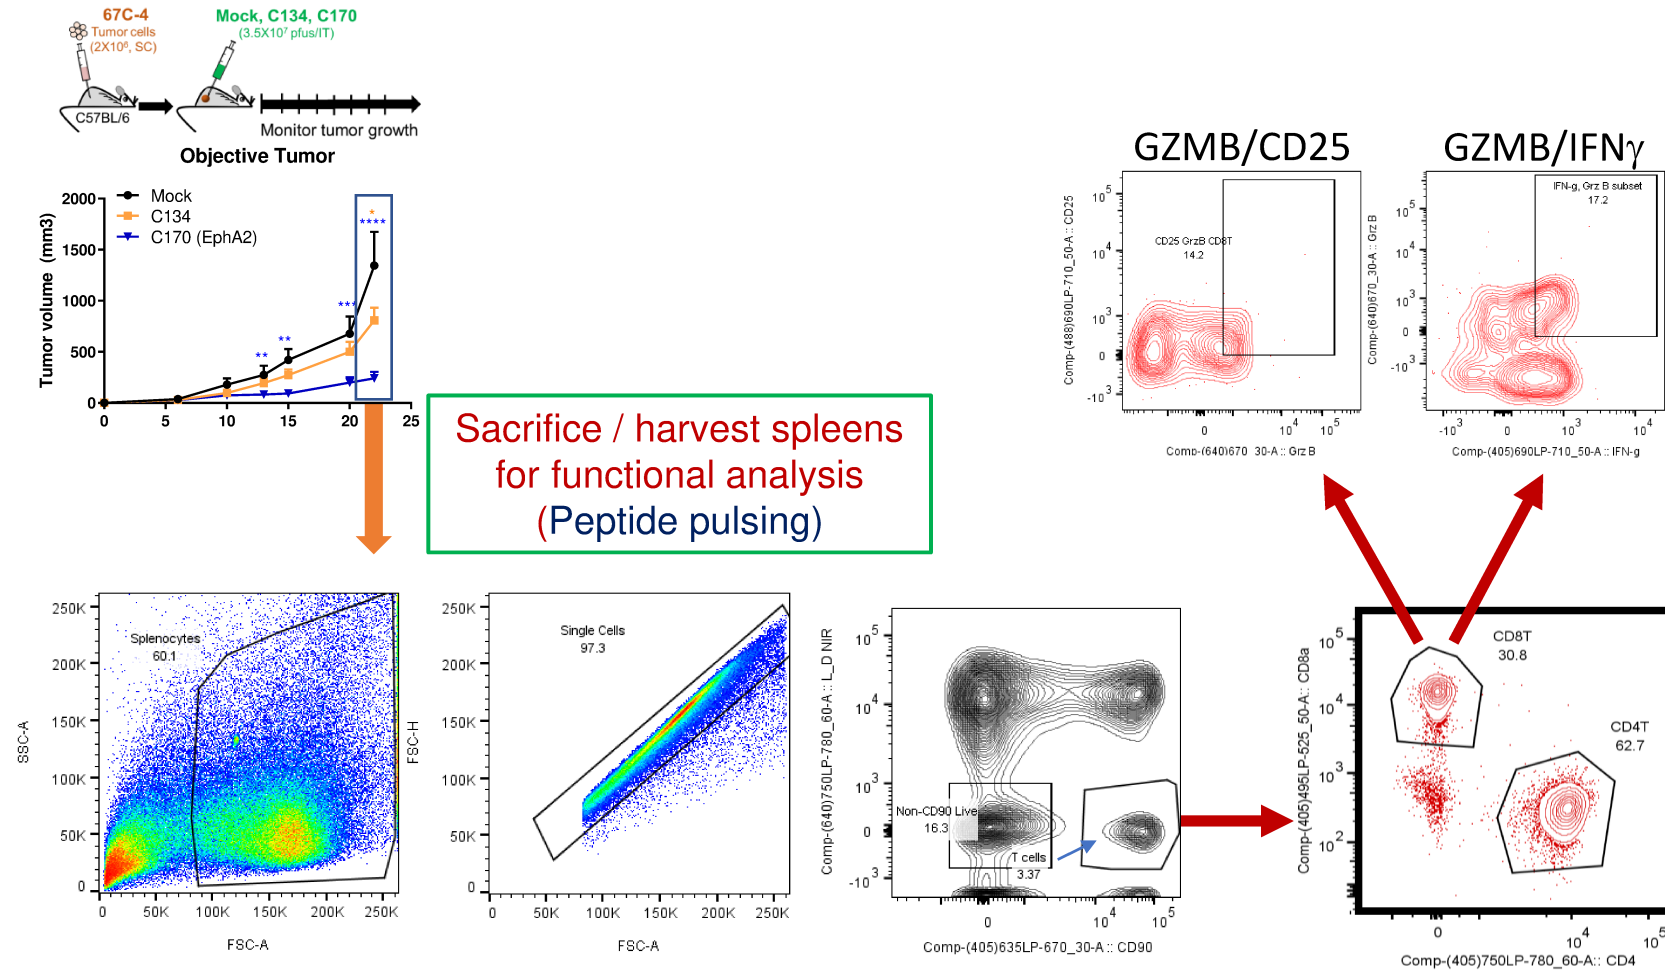

Supplemental Figure 6

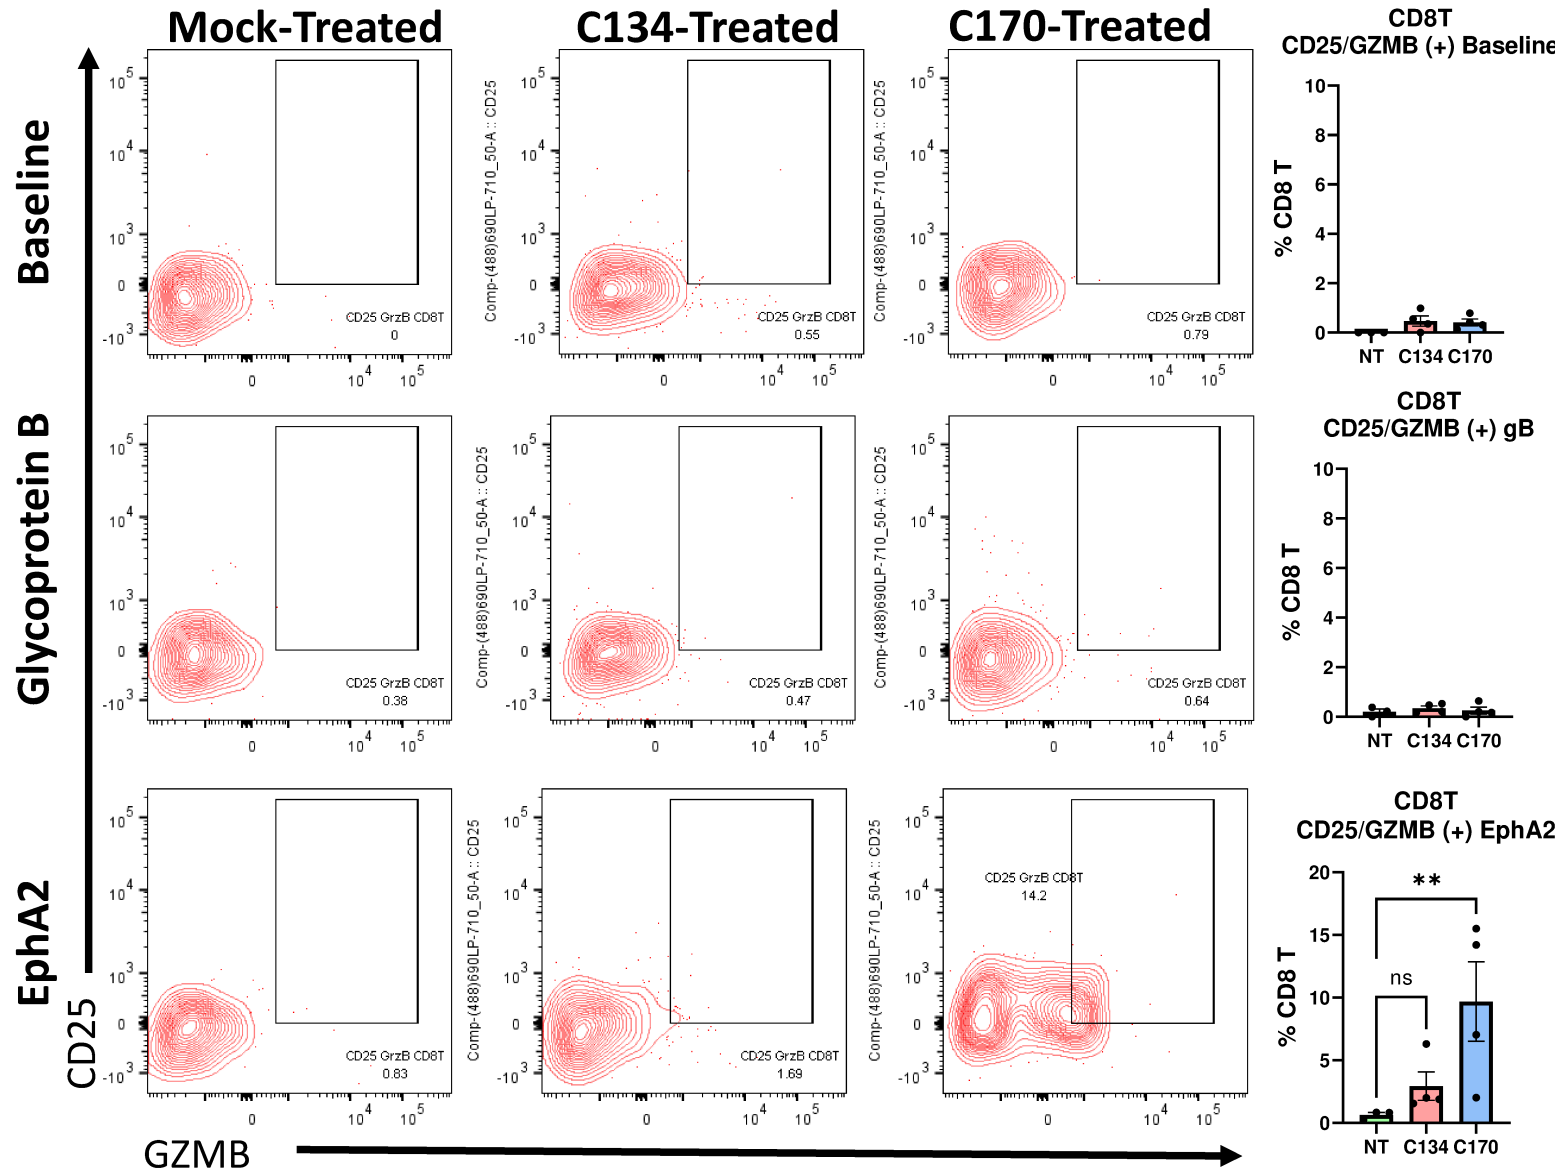

Supplemental Figure 7



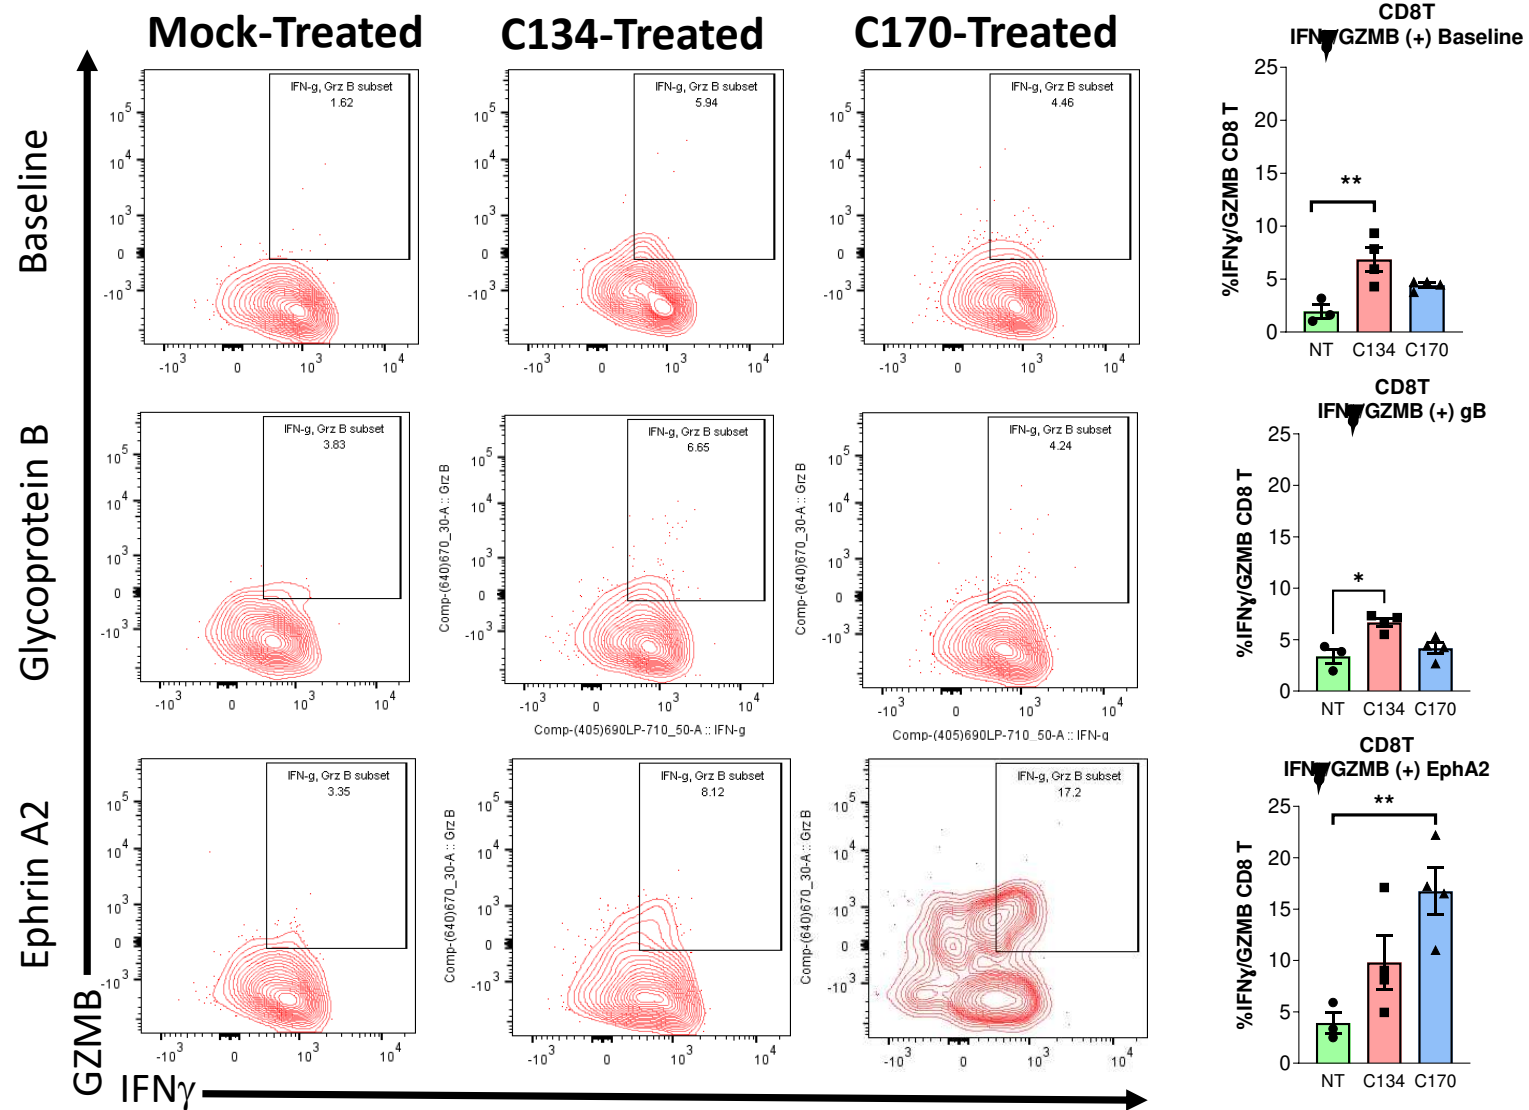

Supplemental Figure 8



## MHC I expression composite and calculated % cells expressing MHC I relative to Isotype: CT2A

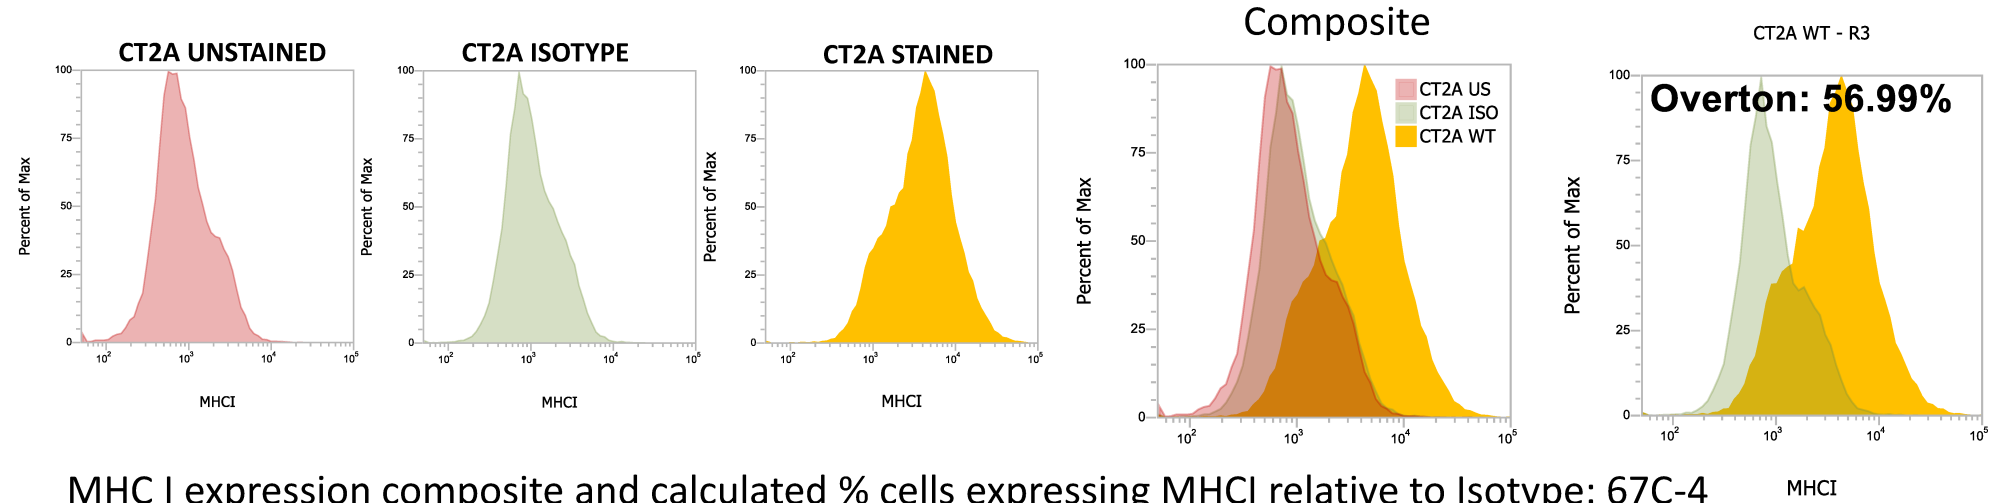

## MHC I expression composite and calculated % cells expressing MHC I relative to Isotype: 67C-4

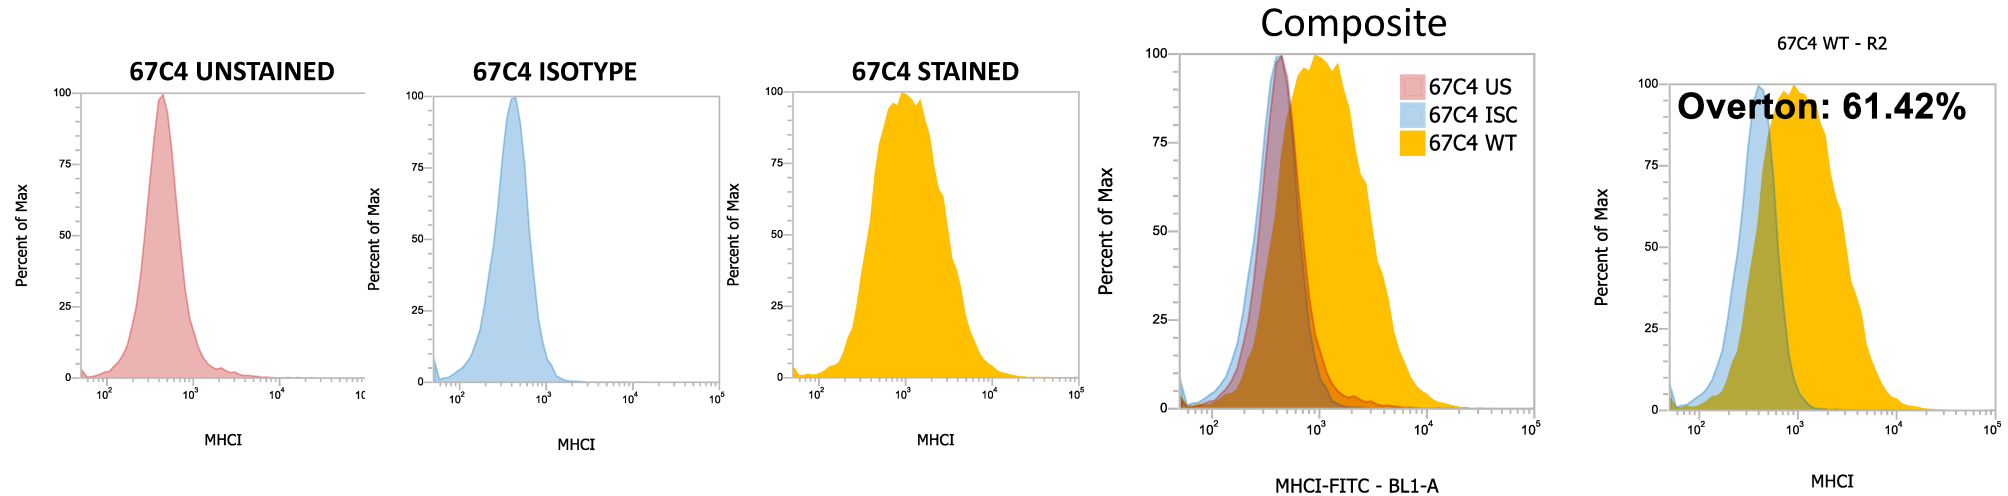

US=unstained  
 ISO= Isotype control  
 WT= MHC I surface expression

Supplemental Figure 10

## EphA2 Protein Schematic

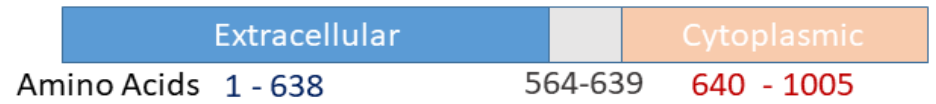

| Pos | Peptide   | B6 H2-<br>Db (nM) | Rank  | B6 H2-<br>Kb (nM) | Rank |
|-----|-----------|-------------------|-------|-------------------|------|
| 804 | YGIVMWEVM | 19.9              | 0.015 | 3661.6            | 5.5  |
| 926 | FMVAGYTAI | 61.7              | 0.04  | 1381.5            | 2.5  |
| 216 | VAVSDTQPL | 125.1             | 0.08  | 1829.5            | 3    |
| 498 | LAPXDITYL | 134               | 0.08  | 7222.6            | 9.5  |
| 671 | FSHHNIIRL | 184.7             | 0.1   | 506.7             | 1.1  |
| 729 | KYLANMNYV | 394.9             | 0.175 | 3654.8            | 5.5  |
| 66  | YSVCNVVSG | 500.1             | 0.25  | 20500.6           | 28   |
| 331 | SAPNYLTAI | 705.1             | 0.3   | 76                | 0.25 |
| 845 | SAIYQLXMM | 1196.6            | 0.4   | 256.6             | 0.7  |
| 28  | VVLLDFAAM | 3680.3            | 1     | 108.6             | 0.3  |
| 601 | AVLKFTTEI | 4333.7            | 1.2   | 402.3             | 0.9  |
| 713 | SVLQLVGML | 5668.1            | 1.5   | 395.4             | 0.9  |
| 790 | ISYRKFTSA | 8660              | 2.5   | 11.5              | 0.04 |
| 726 | SGMKYLANM | 10668.7           | 3     | 11                | 0.03 |
| 4   | RAVGFCLAL | 15570.4           | 5     | 332.9             | 0.8  |
| 407 | MNYTFAVEA | 29797.9           | 14    | 281.6             | 0.7  |
| 558 | FIHRRRRNL | 36101.6           | 22    | 355.4             | 0.8  |
| 682 | VVSKYKPM  | 42639.8           | 38    | 395.1             | 0.9  |

Supplemental Figure 11
